# Supplementary material for: Dynamics of deep soil carbon – insights from 14 C time series across a climatic gradient
Source: Copernicus journal article supplement (doi:10.5194/bg-16-3233-2019), 2019-08-29
Supplement: Supplementary file 1 [file Time-series_14_SI_1901_included_changes.pdf › Time-series_14_SI_1901_included_changes.pdf]

# Supporting Information for

## Dynamics of deep soil carbon – insights from <sup>14</sup>C time-series across a climatic gradient

Tessa Sophia van der Voort<sup>1</sup>, Utsav Mannu<sup>1,†</sup>, Frank Hagedorn<sup>2</sup>, Cameron McIntyre<sup>1,3</sup>, Lorenz Walthert<sup>2</sup>, Patrick Schleppi<sup>2</sup>, Negar Haghipour<sup>1</sup>, Timothy Ian Eglinton<sup>1</sup>

<sup>1</sup>Institute of Geology, ETH Zürich, Sonneggstrasse 5, 8092 Zürich, Switzerland

<sup>2</sup>Forest soils and Biogeochemistry, Swiss Federal Research Institute WSL, Zürcherstrasse 111, 8903 Birmensdorf, Switzerland

<sup>3</sup>Department of Physics, Laboratory of Ion Beam Physics, ETH Zurich, Schaffmattstrasse 20, 9083 Zurich

<sup>†</sup>New address: Department of Earth and Climate Science, IISER Pune, Pune, India

### Contents of this file:

Tables S1-5

Figures S1-3

### Introduction

This supporting information provides details on the modeling approach used in this paper, contains ancillary data and details on the estimation of petrogenic carbon.

### S1 Numerical model in Matlab Environment

The purpose of this section is to explain the necessity of a robust numerical modelling approach for <sup>14</sup>C time-series which can be applied ubiquitously in radiocarbon turnover estimates in oceanic and terrestrial reservoirs.

**The code that can be employed to do this is freely available with this paper.** Torn et al. (2009) explains that a single measured radiocarbon value collected on the falling arm of the bomb-curve yields two estimates of the turnover time. In the case of two time-points, this uncertainty is avoided and a single estimate can be produced. For this reason, time-series radiocarbon can be crucial. Graven et al. (2015) highlighted that owing to continued burning of fossil fuels, the importance of time-series measurements can only increase. In this section, we elaborate on a sensitivity analysis and error propagation analysis. The Matlab numerical optimization runs iterations until the lowest mean-squared error for both time points is reached. There are separate scripts to determine turnover for a single time-point, a time-series and multiple pools.

### S1.1 Necessity of numerical approach

The incorporation of atmospheric <sup>14</sup>C into the any terrestrial reservoir is inherently time-dependent, and therefore as be solved numerically, as can be proven in the following manner: For the isotopic signature of any reservoir the value of a variable at  $R_t$  can be formulated as the following:

$$R_t = R_{t-1} + \frac{\delta R_{t-1}}{\delta t} \Delta t \quad \text{Eq. SI. 1}$$

Here  $R_t$  refers to the new value,  $R_{t-1}$  refers to the previous point,  $\frac{\delta R_{t-1}}{\delta t}$  is the derivative (i.e. slope) of the previous point and  $\Delta t$  refers to the time-step between  $t$  and  $t - 1$ . For any case of uptake of atmospheric <sup>14</sup>CO<sub>2</sub>, the derivative can be determined:

$$\frac{\delta R_{t-1}}{\delta t} = (-\lambda - \kappa)R_{t-1} + \kappa \cdot R_{atm,t} \quad Eq. SI. 2$$

Here,  $\lambda$  refers to the decay rate of  $^{14}\text{C}$ ,  $\kappa$  to the turnover rate, and  $R_{atm,t}$  to the atmospheric value of the atmosphere of year  $t$ . When we combine Eq. SI.1 and Eq. SI.2. Substituting Eq. SI.1 in Eq. SI.2 gives:

$$R_t = R_{t-1} + ((-\lambda - \kappa) R_{t-1} + \kappa \cdot R_{atm,t})\Delta t \quad Eq. SI. 3a$$

Which can be rewritten as:

$$R_t = R_{t-1}(1 - \Delta t \cdot \lambda - \Delta t \cdot \kappa) + \kappa \cdot R_{atm,t} \quad Eq. SI. 3b$$

In this particular scenario we have annual data, so  $\Delta t$  can be defined to 1, resulting in:

$$R_t = R_{t-1}(1 - \lambda - \kappa) + \kappa \cdot R_{atm,t} \quad Eq. SI. 4$$

Which equals the Eq. 2.5 provided in Torn et al. (2009). There is an internal inherent dependency of the value of  $R_t$ , both dependent on the atmospheric input as well as the previous timepoint, which is also dependent on  $\kappa$ .

Therefore, the equation cannot be solved analytically and numerical iteration is required. In the present form, the model can be used in any case for any radiocarbon-based time-series.

### S1.2 Comparison with other temporally resolved models

From the scientific literature, we can discern two families of models dealing with temporally resolved datasets that all build on the equations laid out in Torn et al., (2009). Firstly, there is a group that matches the data to excel-based calculations without the help of optimization using atmospheric input data, e.g. in Schrumppf and Kaiser (2015). Our model differs slightly from this as it includes robust error reduction and a non-subjective estimate. Secondly, there is a group which uses the same equations and combine it with the strength of the Excel Solver function (www.solver.com) and error reduction (Prior et al., 2007; Baisden et al., 2013). We will assume that, as the concerned equations of radioactive decay are non-linear, that the non-linear function of the Excel solver function was used. In these cases, two pools are assumed to be present (one fast decadal pool and one slow millennial pool), there is a steady state and the time step is one year. The age of the passive pool is assumed to be constant (e.g. 1000 years) and the spin-up time starts early 19<sup>th</sup> century, forcing the model to choose a value of the fast pool which is <100 years. The numerical model presented in this study builds on these models by including a measured value of one of the pools instead of an estimated value.

### S1.3 Limitations and drawbacks two-pool model

When finding the best fit for a two-pool model, the optimization estimates the values of two unknowns (fraction size and turnover time). Subsequently, the lowest error is searched in a two-dimensional space (fraction size and turnover time). Solving this constitutes an under constrained problem. The error map is illustrated in SI Figure S1. As is shown, the error does converge to a single value, but there are many options which are nearly equally likely – indicating that the result is not very robust. This is opposed to a single-pool model where the error has a single clear lowest point. This limitation should be considered when interpreting these results.

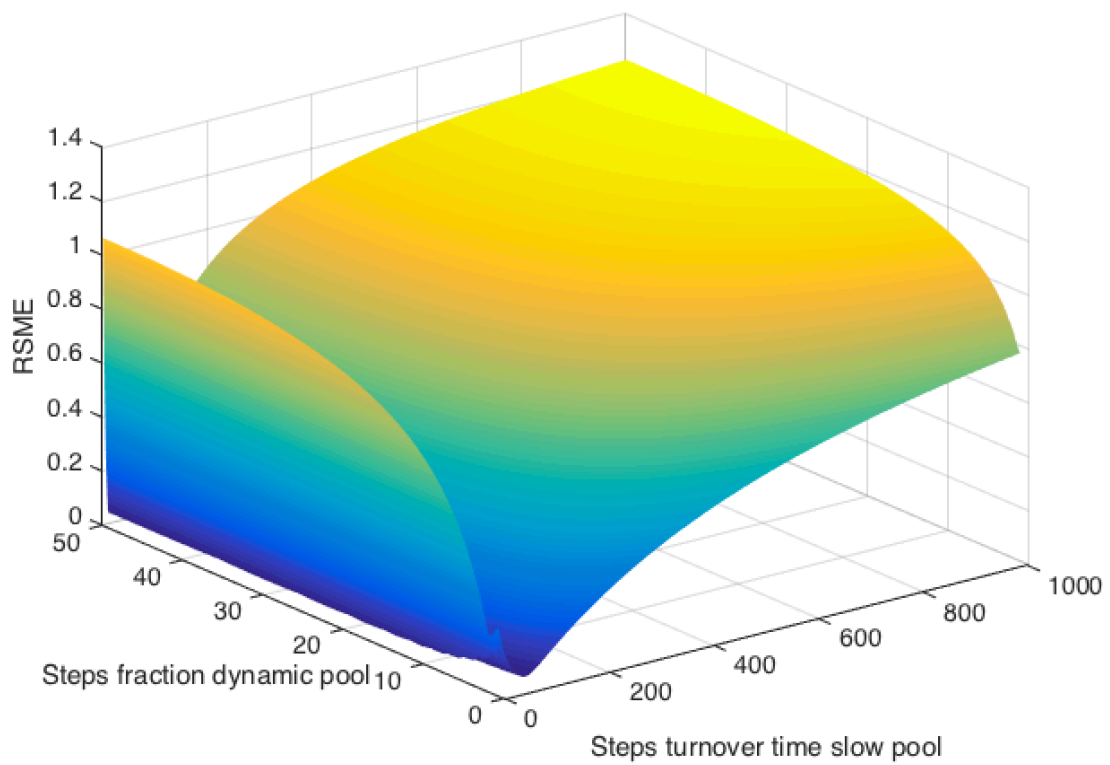

SI Figure 1 Error map of two-pool model for sub-alpine site Beatenberg. The range of turnover times is from 10 to 10.000 in steps of 10, so there are 1000 steps. For the estimated fraction, the range varies from 0.01 to 0.50, so there are 50 steps. The Error is the difference between the modeled R (Equation 3, main text). The pattern mimics the skewed v-shape as seen for the same sample in a single-pool model (Figure 2), but does not appear very sensitive to the fraction parameter.

**Table S1** Beatenberg  $\Delta^{14}\text{C}$  data and modelled turnover data, with single- and temporally- resolved radiocarbon data as visualized in Fig. 2.

| Average depth (cm)            | $\Delta^{14}\text{C}$ 1997 | $\Delta^{14}\text{C}$ 2014 | Turnover 1997<br>(y) | Turnover 2014<br>(y) | Turnover time-<br>series (y) |
|-------------------------------|----------------------------|----------------------------|----------------------|----------------------|------------------------------|
| Organic layer <sub>bulk</sub> | 210.91                     | 98.95                      | 28.7                 | 79.7                 | 14                           |
| 2.5 <sub>bulk</sub>           | -17.61                     | -17.15                     | 404.6                | 412.8                | 410                          |
| 2.5 <sub>WEOC</sub>           | 33.12                      | 7.75                       | 182                  | 199.8                | 191                          |

**Table SI 2** Turnover time (y) for (a) no atmospheric lag and (b) a vegetation-dependent atmospheric lag (Table 2) in the soils of the study sites. Turnover times increase from decadal to centennial in the topsoil to millennial in the deep soil. The modeled vegetation-induced lag only affects the turnover times of the organic layer. As per usual, depth starts at the mineral soil. The organic layer is counted in the negative space. As the organic layer of the Podsol is 20 cm, hence the scale starts at -17.5 cm.

| Turnover time without lag |         |          |         |        |          |
|---------------------------|---------|----------|---------|--------|----------|
| Depth average             | Luvisol | Cambisol | Gleysol | Podsol | Fluvisol |
| -17.50                    | -       | -        | -       | 14     | -        |
| -2.50                     | -       | -        | -       | 92.9   | -        |
| 2.50                      | 78      | 62       | 120     | 410    | 82       |
| 7.50                      | 145     | 327      | 198     | 1175   | 156      |
| 15.00                     | 234     | 511      | 715     | 1656   | 240      |
| 30.00                     | 360     | 662      | 2108    | 1917   | 615      |
| 50.00                     | 1376    | 1816     | 4520    | 1297   | 608      |
| 70.00                     | 3938    | 1640     | 4946    | -      | 983      |
| 90.00                     | -       | 2852     | 5383    | -      | -        |

  

| Turnover time vegetation dependent lag |               |                |               |             |               |
|----------------------------------------|---------------|----------------|---------------|-------------|---------------|
| Depth average                          | Luvisol - 2 y | Cambisol - 3 y | Gleysol - 7 y | Podsol- 8 y | Fluvisol- 8 y |
| -17.50                                 | -             | -              | -             | 4           | -             |
| -2.50                                  | -             | -              | -             | 100         | -             |
| 2.50                                   | 80            | 64             | 125           | 404         | 82            |
| 7.50                                   | 145           | 324            | 200           | 1169        | 154           |
| 15.00                                  | 234           | 508            | 714           | 1651        | 236           |
| 30.00                                  | 360           | 662            | 2107          | 1912        | 607           |
| 50.00                                  | 1375          | 1816           | 4519          | 1296        | 607           |
| 70.00                                  | 3938          | 1640           | 4945          | -           | 981           |
| 90.00                                  | -             | 2852           | 5383          | -           | -             |

96 **Table SI 3** Residual error for (a) no atmospheric lag and (b) a vegetation-dependent atmospheric lag (Table 2)  
97 in the soils of the study sites.

| Residual Error no vegetation lag |                     |                     |                     |                     |                     |
|----------------------------------|---------------------|---------------------|---------------------|---------------------|---------------------|
| Av. depth (cm)                   | Othmarsingen        | Lausanne            | Alptal              | Beatenberg          | Nationalpark        |
| -17.50                           | -                   | -                   | -                   | $1.3 \cdot 10^{-2}$ | -                   |
| -2.50                            | -                   | -                   | -                   | $3.6 \cdot 10^{-5}$ | -                   |
| 2.50                             | $2.9 \cdot 10^{-2}$ | $6.8 \cdot 10^{-3}$ | $1.2 \cdot 10^{-5}$ | $7.1 \cdot 10^{-4}$ | $5.0 \cdot 10^{-2}$ |
| 7.50                             | $2.0 \cdot 10^{-2}$ | $4.1 \cdot 10^{-2}$ | $5.9 \cdot 10^{-6}$ | $3.6 \cdot 10^{-2}$ | $1.9 \cdot 10^{-2}$ |
| 15.00                            | $1.5 \cdot 10^{-3}$ | $5.7 \cdot 10^{-2}$ | $4.4 \cdot 10^{-6}$ | $6.0 \cdot 10^{-2}$ | $4.1 \cdot 10^{-3}$ |
| 30.00                            | $1.9 \cdot 10^{-6}$ | $6.0 \cdot 10^{-6}$ | $1.0 \cdot 10^{-6}$ | $6.0 \cdot 10^{-2}$ | $4.0 \cdot 10^{-2}$ |
| 50.00                            | $2.2 \cdot 10^{-7}$ | $1.7 \cdot 10^{-7}$ | $7.9 \cdot 10^{-7}$ | $1.3 \cdot 10^{-6}$ | $6.9 \cdot 10^{-6}$ |
| 70.00                            | $1.4 \cdot 10^{-1}$ | $5.2 \cdot 10^{-7}$ | $5.1 \cdot 10^{-8}$ | -                   | -                   |
| 90.00                            | -                   | $2.7 \cdot 10^{-6}$ | $1.8 \cdot 10^{-6}$ | -                   | -                   |

| Residual Error with vegetation lag |                         |                     |                     |                       |                         |
|------------------------------------|-------------------------|---------------------|---------------------|-----------------------|-------------------------|
| Av. depth (cm)                     | Othmarsingen<br>2 years | Lausanne<br>3 years | Alptal<br>7 years   | Beatenberg<br>8 years | Nationalpark<br>8 years |
| -17.50                             | -                       | -                   | -                   | $2.9 \cdot 10^{-2}$   | -                       |
| -2.50                              | -                       | -                   | -                   | $1.3 \cdot 10^{-5}$   | -                       |
| 2.50                               | $3.1 \cdot 10^{-2}$     | $1.0 \cdot 10^{-2}$ | $1.2 \cdot 10^{-5}$ | $2.2 \cdot 10^{-3}$   | $4.2 \cdot 10^{-2}$     |
| 7.50                               | $2.1 \cdot 10^{-2}$     | $4.0 \cdot 10^{-2}$ | $1.1 \cdot 10^{-5}$ | $3.6 \cdot 10^{-2}$   | $1.5 \cdot 10^{-2}$     |
| 15.00                              | $2.0 \cdot 10^{-3}$     | $5.6 \cdot 10^{-2}$ | $5.8 \cdot 10^{-6}$ | $5.9 \cdot 10^{-2}$   | $6.7 \cdot 10^{-3}$     |
| 30.00                              | $9.0 \cdot 10^{-6}$     | $7.3 \cdot 10^{-3}$ | $1.6 \cdot 10^{-6}$ | $5.9 \cdot 10^{-2}$   | $3.9 \cdot 10^{-2}$     |
| 50.00                              | $5.8 \cdot 10^{-7}$     | $3.5 \cdot 10^{-6}$ | $6.4 \cdot 10^{-7}$ | $5.7 \cdot 10^{-7}$   | $6.2 \cdot 10^{-7}$     |
| 70.00                              | $1.4 \cdot 10^{-1}$     | $3.3 \cdot 10^{-6}$ | $9.3 \cdot 10^{-7}$ | -                     | $1.3 \cdot 10^{-6}$     |
| 90.00                              | -                       | $1.9 \cdot 10^{-6}$ | $8.4 \cdot 10^{-8}$ | -                     | -                       |

99  
100

**Table S4** Overview of the carbon content of the bulk soil and the relative contribution of WEOC to the total organic carbon pool.

| Av.<br>Depth | Othmarsingen  |                                                    | Lausanne      |                                                    | Alptal        |                                                    | Beatenberg    |                                                    | Nationalpark  |                                                    |
|--------------|---------------|----------------------------------------------------|---------------|----------------------------------------------------|---------------|----------------------------------------------------|---------------|----------------------------------------------------|---------------|----------------------------------------------------|
|              | Bulk C<br>(%) | WEOC<br>C <sup>-1</sup> gsoil <sup>-1</sup><br>(%) |
| -17.5        | -             | -                                                  | -             | -                                                  | -             | -                                                  | 34.4          | -                                                  | -             | -                                                  |
| -2.5         | -             | -                                                  | -             | -                                                  | -             | -                                                  | 27.3          | -                                                  | -             | -                                                  |
| 2.5          | 3.7           | 5.4·10 <sup>-5</sup>                               | 5.4           | 6.6·10 <sup>-5</sup>                               | 44.8          | 1.1·10 <sup>-5</sup>                               | 9.2           | 2.4·10 <sup>-4</sup>                               | 21.6          | 2.0·10 <sup>-5</sup>                               |
| 7.5          | 1.6           | 9.5·10 <sup>-5</sup>                               | 1.9           | 1.7·10 <sup>-4</sup>                               | 13.5          | 6.9·10 <sup>-5</sup>                               | 2.4           | 3.1·10 <sup>-4</sup>                               | 7.5           | 3.2·10 <sup>-5</sup>                               |
| 15           | 1.4           | 9.6·10 <sup>-5</sup>                               | 1.4           | 1.8·10 <sup>-4</sup>                               | 7.4           | 4.6·10 <sup>-4</sup>                               | 2.0           | 3.2·10 <sup>-4</sup>                               | 1.7           | 1.4·10 <sup>-4</sup>                               |
| 30           | 0.9           | 1.4·10 <sup>-4</sup>                               | 0.8           | 2.4·10 <sup>-4</sup>                               | 5.1           | 2.9·10 <sup>-5</sup>                               | 0.6           | 3.9·10 <sup>-4</sup>                               | 0.6           | -                                                  |
| 50           | 0.3           | -                                                  | 0.5           | 5.1·10 <sup>-4</sup>                               | 2.4           | -                                                  | 0.8           | 2.9·10 <sup>-4</sup>                               | 0.2           | -                                                  |
| 70           | 0.2           | -                                                  | 0.2           | 1.1·10 <sup>-3</sup>                               | 3.1           | -                                                  | -             | -                                                  | 0.2           | -                                                  |
| 90           | -             | -                                                  | 0.2           |                                                    | 2.3           | -                                                  | -             | -                                                  | -             | -                                                  |

101

**Table S5** Modelled turnover time of bulk carbon, the dynamic WEOC pool and estimates of dynamic pool size and error.

| Site         | Depth | Estimated size    |                   | Residual error |
|--------------|-------|-------------------|-------------------|----------------|
|              |       | WEOC turnover (y) | Bulk turnover (y) | two-pool model |
| Othmarsingen | 2.5   | 38.4              | 78                | 0.2            |
|              | 7.5   | 33.4              | 145               | 0.15           |
|              | 15    | 33.4              | 234               | 0.01           |
|              | 30    | 33.4              | 360               | -              |
|              | 50    | 1001              | 1376              | -              |
|              | 70    | -                 | 3938              | -              |
| Lausanne     | 2.5   | 31.8              | 62                | 0.1            |
|              | 7.5   | 80                | 327               | 0.01           |
|              | 15    | 98.2              | 511               | 0.01           |
|              | 30    | 185.6             | 662               | -              |
|              | 50    | 987.4             | 1816              | -              |
|              | 70    | 1501.9            | 1640              | -              |
|              | 90    | -                 | 2852              | -              |
| Alptal       | 2.5   | 42.1              | 120               | -              |
|              | 7.5   | 111.2             | 198               | -              |
|              | 15    | 254.6             | 715               | -              |
|              | 30    | 892.9             | 2108              | -              |
|              | 50    | -                 | 4520              | -              |
|              | 70    | -                 | 4946              | -              |
|              | 90    | -                 | 5383              | -              |
| Beatenberg   | 2.5   | 191.3             | 410               | 0.26           |
|              | 7.5   | 282.6             | 1175              | 0.41           |
|              | 15    | 348.8             | 1656              | 0.47           |
|              | 30    | 923.2             | 1917              | 0.23           |
|              | 50    | 431.1             | 1297              | -              |
| Nationalpark | 2.5   | 63.9              | 82                | 0.01           |
|              | 7.5   | 96.3              | 156               | 0.01           |
|              | 15    | 104.8             | 240               | 0.47           |
|              | 30    | 213.5             | 615               | 0.1            |
|              | 50    | -                 | 608               | -              |
|              | 70    | -                 | 983               | -              |



105 **Table S6** Estimation potential contribution petrogenic carbon for two sites containing sedimentary carbon assuming for Alptal the signature of a sedimentary-carbon free soil  
 106 and for Lausanne the shallower depth. The signature of the shale is assumed to be devoid of radiocarbon. The fossil contribution =  $\frac{\Delta^{14}C_{measurement} - \Delta^{14}C_{non-fossil\ carbon\ soil}}{\Delta^{14}C_{shale} - \Delta^{14}C_{non-fossil\ carbon\ soil}}$

|                                                   | $\Delta^{14}C_{\text{Alptal at 90 cm}}(\text{‰})$   | $\Delta^{14}C_{\text{Beatenberg at 60 cm}}(\text{‰})$ | Shale (‰) | Contribution fossil |
|---------------------------------------------------|-----------------------------------------------------|-------------------------------------------------------|-----------|---------------------|
| Alptal $\Delta^{14}C_{90\text{ cm}}(\text{‰})$    | -640.3                                              | -421.3                                                | -1000     | 0.38                |
|                                                   | $\Delta^{14}C_{\text{Lausanne at 80 cm}}(\text{‰})$ |                                                       |           |                     |
| Lausanne $\Delta^{14}C_{145\text{ cm}}(\text{‰})$ | -533.2                                              | -252.5                                                | -1000     | 0.38                |
| Lausanne $\Delta^{14}C_{210\text{ cm}}(\text{‰})$ | -403.5                                              | -252.5                                                | -1000     | 0.20                |
| Lausanne $\Delta^{14}C_{270\text{ cm}}(\text{‰})$ | -186.4                                              | -252.5                                                | -1000     | -                   |
| Lausanne $\Delta^{14}C_{310\text{ cm}}(\text{‰})$ | -820.2                                              | -252.5                                                | -1000     | 0.76                |

107  
 108

109 **Table S7** Pedogenic oxides as determined by oxalate-exactable Fe and Al on soil samples on single profiles taken proximal to the plots (courtesy Stephan Zimmerman, WSL  
110 LWF).

111

| Othmarsingen       |          |          | Lausanne           |          |          | Alptal             |          |          | Beatenberg         |          |          | Nationalpark          |             |             |
|--------------------|----------|----------|--------------------|----------|----------|--------------------|----------|----------|--------------------|----------|----------|-----------------------|-------------|-------------|
| Soil depth<br>(cm) | Fe (ppm) | Al (ppm) | Soil depth<br>(cm) | Fe (ppm) | Al (ppm) | Soil depth<br>(cm) | Fe (ppm) | Al (ppm) | Soil depth<br>(cm) | Fe (ppm) | Al (ppm) | Soil<br>depth<br>(cm) | Fe<br>(ppm) | Al<br>(ppm) |
| 2.5                | 2273     | 1298     | 2.5                | 3356     | 1861     | 2.5                | 13160    | 2577     | 2                  | 1072     | 748      | 2.5                   | 3004        | 756         |
| 7.5                | 2423     | 1317     | 7.5                | 3400     | 1879     | 7.5                | 17145    | 2937     | 7                  | 102      | 222      | 7.5                   | 1709        | 273         |
| 15                 | 2307     | 1222     | 15                 | 3039     | 2030     | 15                 | 16408    | 2731     | 15                 | 133      | 280      | 15                    | 1583        | 230         |
| 30                 | 2348     | 1174     | 35                 | 3100     | 1942     | 30                 | 4958     | 1470     | 25                 | 189      | 431      | 30                    | 761         | 180         |
| 65                 | 3868     | 1605     | 80                 | 2095     | 1156     | 50                 | 4564     | 1017     | 43                 | 4178     | 1330     | 50                    | 497         | 115         |
|                    |          |          |                    |          |          |                    |          |          | 60                 | 162      | 1914     | 76.5                  | 568         | 139         |

112

113

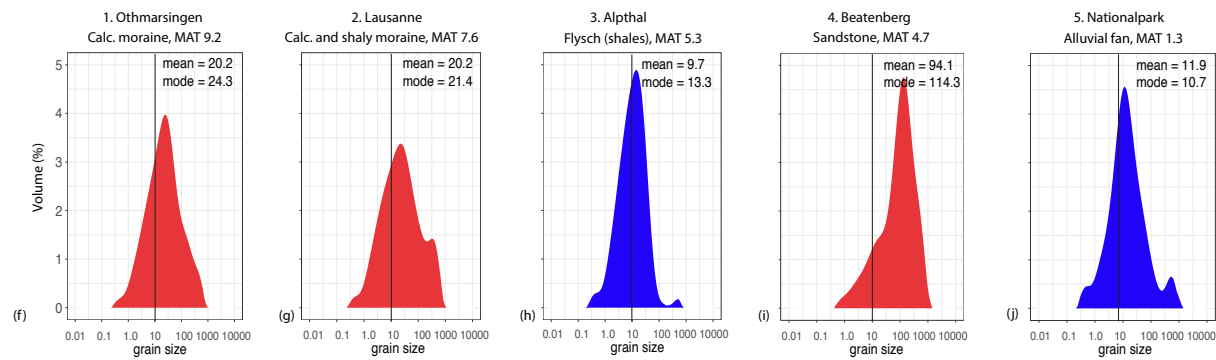

**Figure S3** Visualization of grain size distribution five sites at 10-20 cm depth in the mineral soil. The sites Alpthal and Nationalpark are underlain by respectively shale and intercalating alluvial fan with silty and sandy layers.

**Table S8** Grain size distribution data of the five concerned sites.

| Site         | Depth | Grain size 0.1 | Grain size mean | Grain size 0.9 | Mode  |
|--------------|-------|----------------|-----------------|----------------|-------|
| Othmarsingen | 2.5   | 3.1            | 19.8            | 151.0          | 21.4  |
|              | 7.5   | 2.8            | 20.0            | 147.7          | 23.0  |
|              | 15    | 2.6            | 20.2            | 157.0          | 24.3  |
|              | 30    | 2.7            | 21.6            | 139.0          | 28.4  |
|              | 50    | 3.0            | 30.2            | 217.0          | 38.0  |
|              | 70    | 3.2            | 28.4            | 19.6           | 36.0  |
| Lausanne     | 2.5   | 2.0            | 11.160          | 108.2          | 10.5  |
|              | 7.5   | 2.4            | 17.3            | 150.7          | 19.1  |
|              | 15    | 2.5            | 20.2            | 221.8          | 21.4  |
|              | 30    | 2.2            | 16.5            | 198.5          | 17.7  |
|              | 50    | 2.3            | 19.6            | 176.0          | 26.5  |
|              | 70    | 2.6            | 22.2            | 253.9          | 25.7  |
| Alptal       | 2.5   | 2.4            | 9.9             | 26.8           | 12.2  |
|              | 7.5   | 2.5            | 12.3            | 36.6           | 16.9  |
|              | 15    | 2.0            | 9.7             | 34.8           | 13.4  |
|              | 30    | 1.9            | 8.3             | 27.0           | 10.6  |
| Beatenberg   | 2.5   | 4.8            | 26.4            | 242.7          | 21.7  |
|              | 15    | 7.3            | 94.1            | 384.5          | 114.3 |
|              | 30    | 6.2            | 87.9            | 437.5          | 114.3 |
|              | 50    | 7.3            | 75.9            | 296.9          | 112.8 |
| Nationalpark | 2.5   | 3.0            | 17.8            | 107.2          | 15.3  |
|              | 7.5   | 1.7            | 9.5             | 87.7           | 8.9   |
|              | 15    | 2.0            | 11.9            | 84.3           | 10.7  |
|              | 30    | 3.0            | 22.8            | 706.1          | 623.6 |
|              | 50    | 2.7            | 19.0            | 454.5          | 11.2  |
|              | 70    | 3.4            | 36.9            | 857.7          | 690.0 |
