# Supplementary material for: Dynamics of deep soil carbon – insights from 14 C time series across a climatic gradient
Source: Copernicus journal article supplement (doi:10.5194/bg-16-3233-2019), 2019-08-29
Supplement: Supplementary file [file bg-16-3233-2019-supplement-title-page.pdf › bg-16-3233-2019-supplement-title-page.pdf]

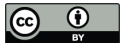

## *Supplement of*

# **Dynamics of deep soil carbon – insights from $^{14}\text{C}$ time series across a climatic gradient**

**Tessa Sophia van der Voort et al.**

*Correspondence to:* Tessa Sophia van der Voort (tessa.vandervoort@erdw.ethz.ch)

- bg-16-3233-2019-supplement-title-page.pdf
- Radiocarbon\_modelling\_single\_timepoint\_2014.m
- Radiocarbon\_modelling\_time\_series\_commented.m
- Radiocarbon\_modelling\_two\_pool\_model\_optim\_2019.m
- Time-series\_14\_SI\_1901\_included\_changes.pdf
- UDnew.mat
- \_\_MACOSX
  - .\_Radiocarbon\_modelling\_single\_timepoint\_2014.m
  - .\_Radiocarbon\_modelling\_time\_series\_commented.m
  - .\_Radiocarbon\_modelling\_two\_pool\_model\_optim\_2019.m
  - .\_Time-series\_14\_SI\_1901\_included\_changes.pdf
  - .\_UDnew.mat

The copyright of individual parts of the supplement might differ from the CC BY 4.0 License.
